# Supplementary material
Source: publisher site journal article supplement (https://www.dovepress.com/article/supplementary_file/611679/611679%20Supplementary%20materials.docx)
Supplement: Supplementary file 1 [file 611679%20Supplementary%20materials.docx]

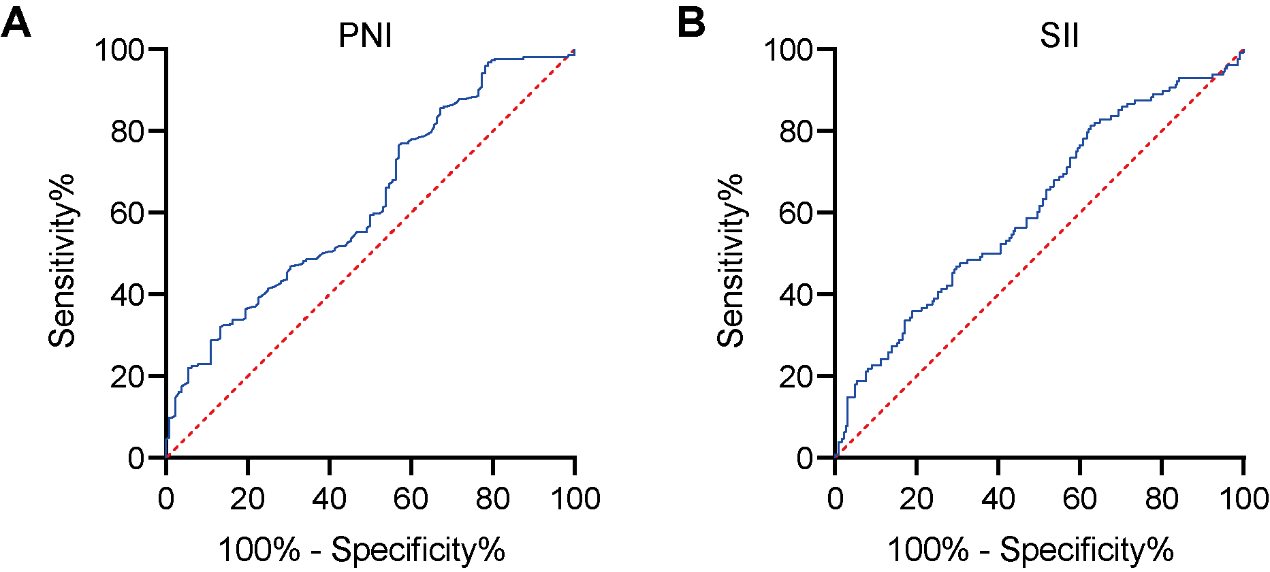


**Supplementary Figure 1.** Receiver operator characteristic curves for determining the cut-off values of PNI (A) and SII (B) in cancer patients receiving immune checkpoint inhibitors


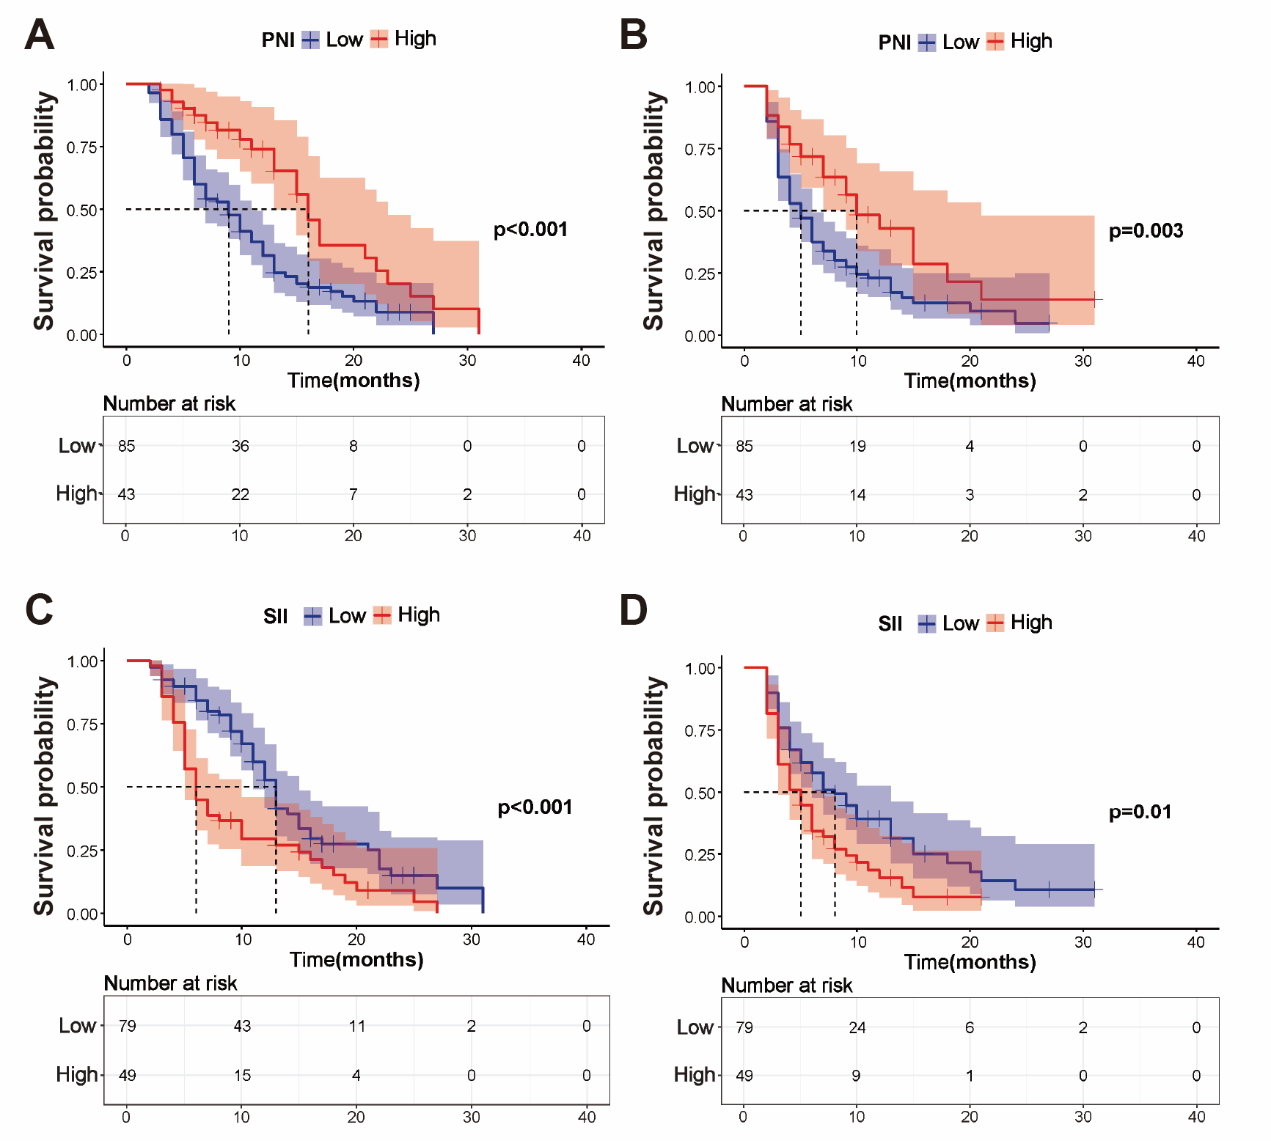


**Supplementary Figure 2.** Prognostic significance of PNI and SII in non-small cell lung cancer patients receiving immune checkpoint inhibitors (ICIs). (A, B) Kaplan-Meier curves for the association of PNI with overall survival (OS) (A) and progression-free survival (PFS) (B) in non-small cell lung cancer patients receiving ICIs. (C, D) Kaplan-Meier curves for the association of SII with OS (C) and PFS (D) in non-small cell lung cancer patients receiving ICIs.


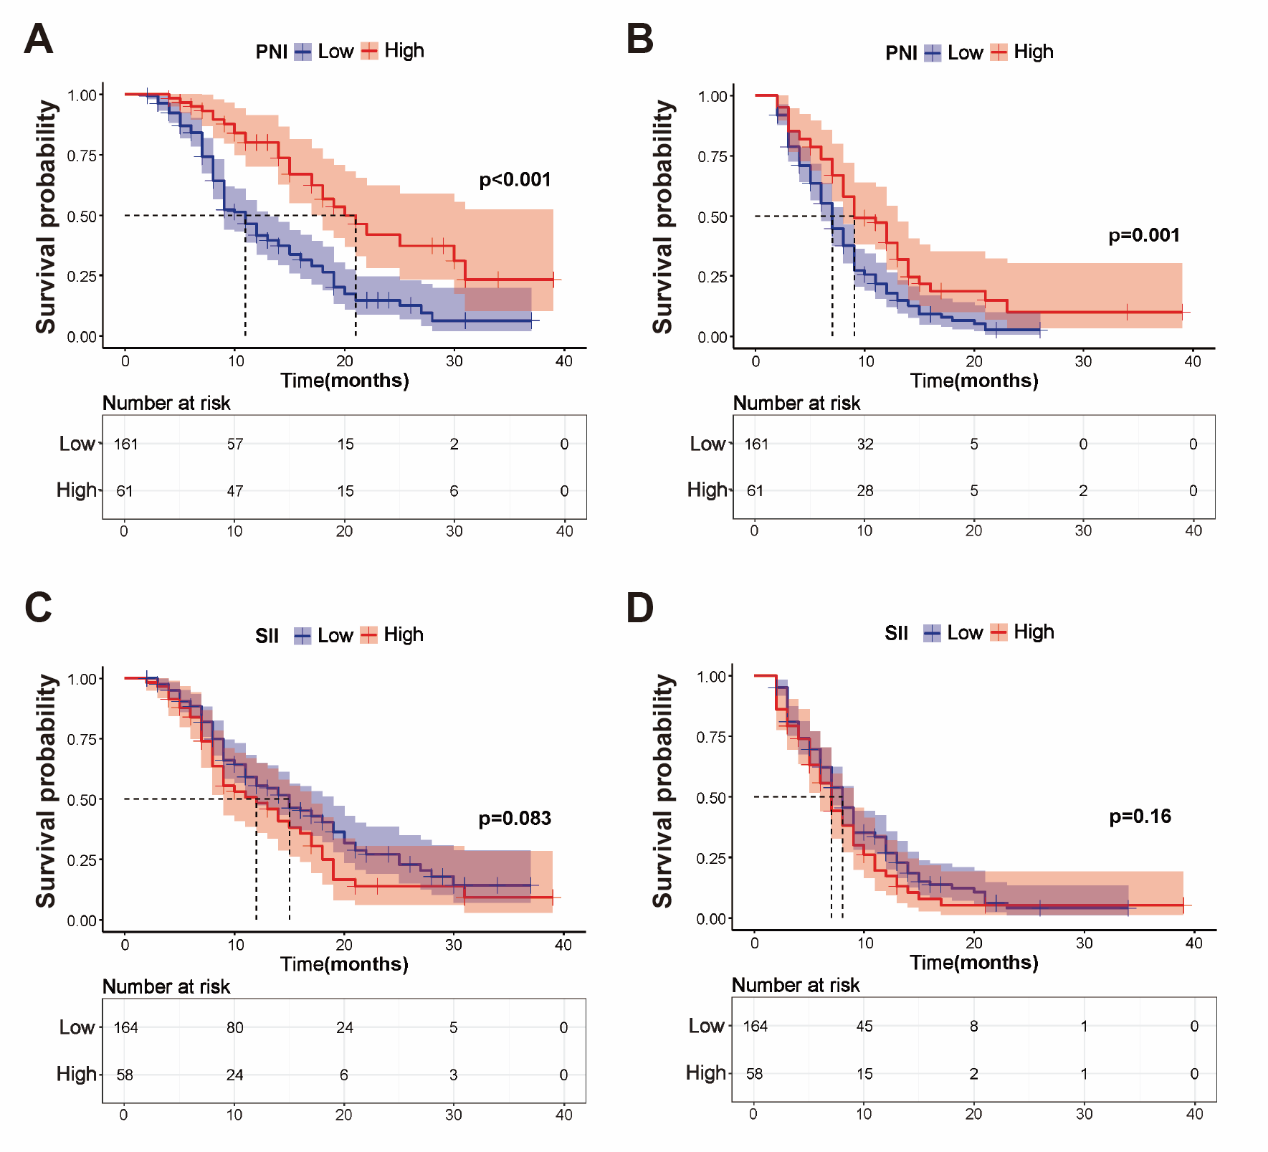


**Supplementary Figure 3.** Prognostic significance of PNI and SII in digestive cancer patients receiving immune checkpoint inhibitors (ICIs). (A, B) Kaplan-Meier curves for the association of PNI with overall survival (OS) (A) and progression-free survival (PFS) (B) in digestive cancer patients receiving ICIs. (C, D) Kaplan-Meier curves for the association of SII with OS (C) and PFS (D) in digestive cancer patients receiving ICIs.


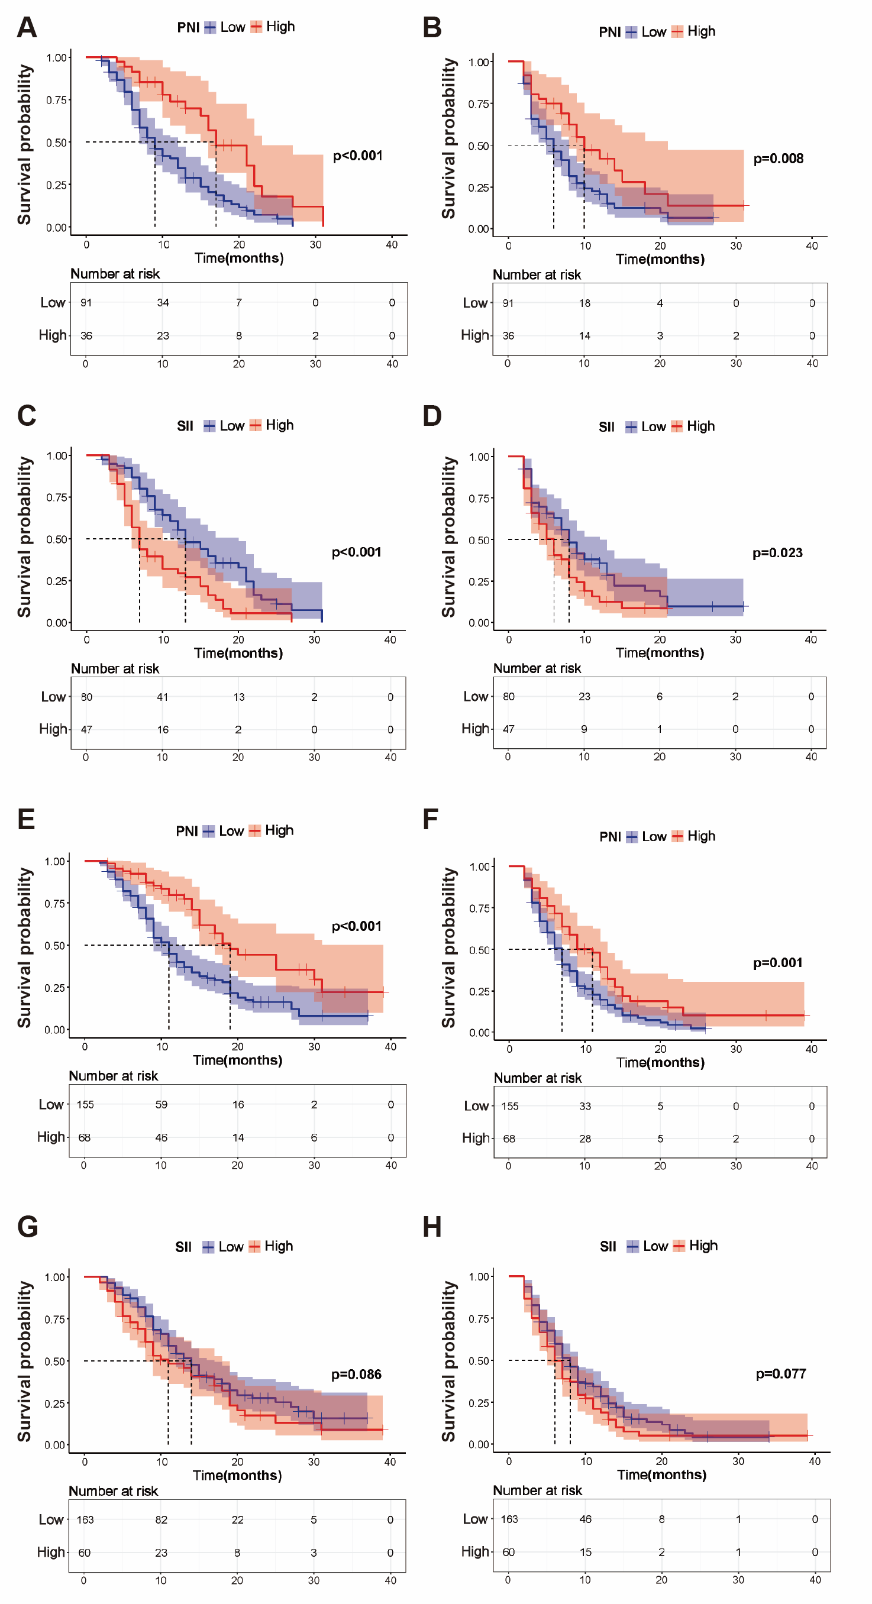


**Supplementary Figure 4.** Prognostic significance of PNI and SII in cancer patients based on smoking history. (A, B) Kaplan-Meier curves for the association of PNI with overall survival (OS) (A) and progression-free survival (PFS) (B) in patients with smoking history. (C, D) Kaplan-Meier curves for the association of SII with OS (C) and PFS (D) in cancer patients with smoking history. (E, F) Kaplan-Meier curves for the association of PNI with overall survival (OS) (E) and progression-free survival (PFS) (F) in patients without smoking history. (G, H) Kaplan-Meier curves for the association of SII with OS (G) and PFS (H) in cancer patients without smoking history.


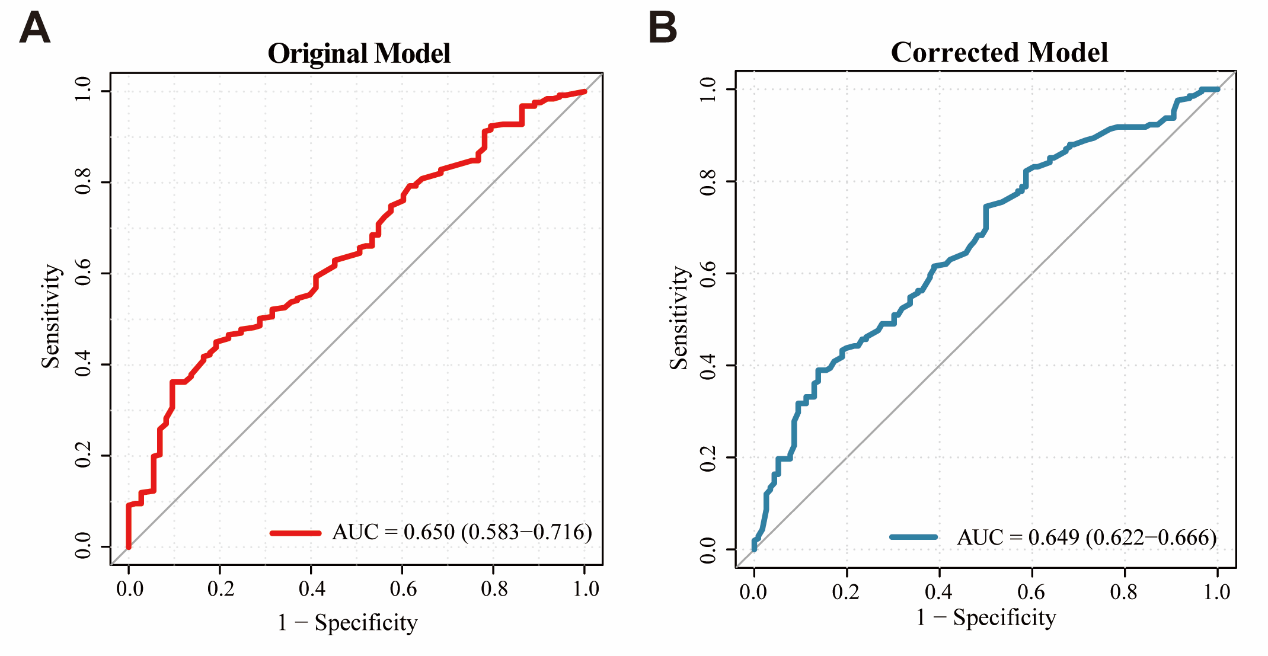


**Supplementary Figure 5.** Receiver operating characteristic (ROC) curves of the PNI-SII score for predicting overall survival (OS) in cancer patients receiving immune checkpoint inhibitors (ICIs). (A) Original ROC curve derived from the study cohort. (B) Bootstrap-corrected ROC curve after internal validation.


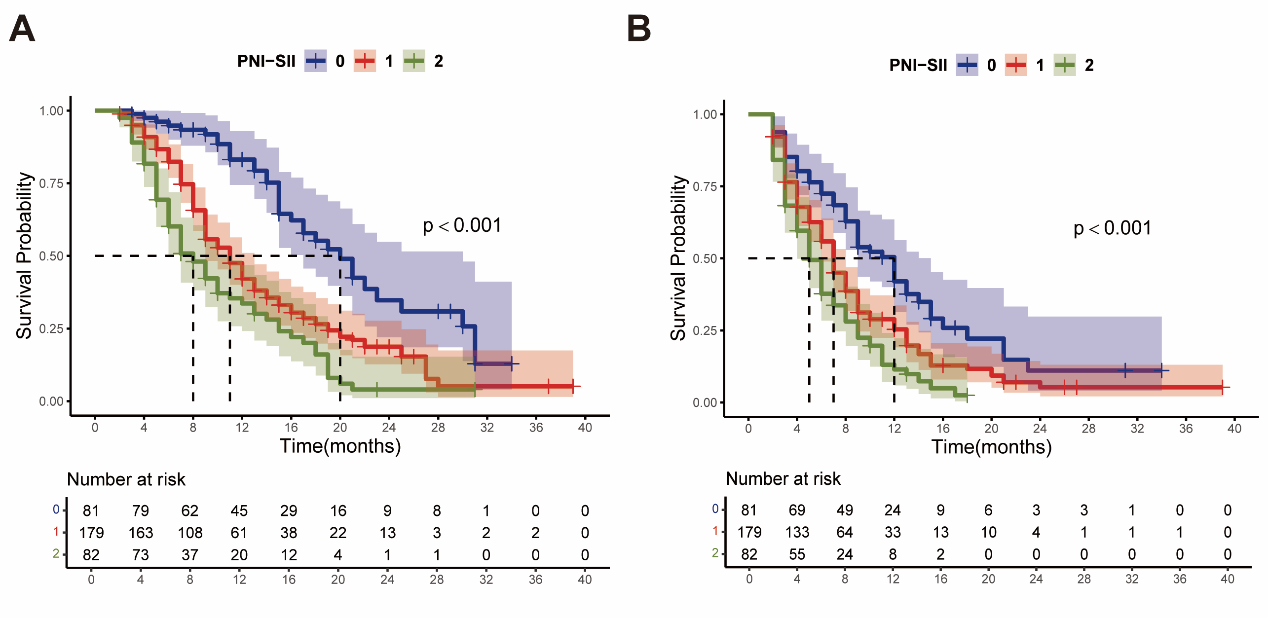


**Supplementary Figure 6.** Prognostic significance of PNI-SII score in cancer patients receiving anti-PD-1-based combination therapy. (A, B) Kaplan-Meier curves for the association of PNI-SII score with overall survival (OS) (A) and progression-free survival (PFS) (B) in patients receiving anti-PD-1-based combination therapy.

Supplementary Table 1. Univariate and multivariate analysis for the overall survival of the entire cohort.

| Characteristics | Overall survival | | | | | | |
| --- | --- | --- | --- | --- | --- | --- | --- |
| Univariate analysis | | |  | Multivariate analysis | | |
| HR | 95% CI | p | HR | 95% CI | p |
| Gender | 1.266 | 0.916-1.748 | 0.153 |  |  |  |  |
| Age | 1.330 | 1.014-1.744 | **0.039** |  | 1.349 | 1.022-1.780 | **0.035** |
| Surgery history | 0.810 | 0.600-1.093 | 0.168 |  |  |  |  |
| Tumor staging | 1.067 | 0.801-1.419 | 0.659 |  |  |  |  |
| ECOG | 1.100 | 0.777-1.557 | 0.592 |  |  |  |  |
| Smoking | 1.406 | 1.077-1.836 | **0.012** |  | 1.145 | 0.848-1.546 | 0.377 |
| Alcohol consumption | 1.181 | 0.901-1.548 | 0.229 |  |  |  |  |
| Treatment | 0.985 | 0.572-1.696 | 0.957 |  |  |  |  |
| PNI | 0.429 | 0.313-0.589 | **<0.001** |  | 0.444 | 0.323-0.612 | **<0.001** |
| SII | 1.646 | 1.253-2.161 | **<0.001** |  | 1.513 | 1.150-1.991 | **0.003** |
| Cancer type | 1.511 | 1.158-1.973 | **0.002** |  | 1.443 | 1.070-1.946 | **0.016** |

Abbreviations: ECOG, Eastern Cooperative Oncology Group; PNI, prognostic nutritional index; SII, systemic immune-inflammatory index; HR, Hazard Ratio; 95%CI, Confidence interval.

Supplementary Table 2. Univariate and multivariate analysis for the progression-free survival of the entire cohort

| Characteristics | Progression-free survival | | | | | | |
| --- | --- | --- | --- | --- | --- | --- | --- |
| Univariate analysis | | |  | Multivariate analysis | | |
| HR | 95% CI | p | HR | 95% CI | p |
| Gender | 1.067 | 0.803-1.418 | 0.653 |  |  |  |  |
| Age | 1.137 | 0.886-1.460 | 0.312 |  |  |  |  |
| Surgery history | 1.018 | 0.780-1.329 | 0.894 |  |  |  |  |
| Tumor staging | 1.157 | 0.892-1.500 | 0.271 |  |  |  |  |
| ECOG | 1.146 | 0.835-1.572 | 0.399 |  |  |  |  |
| Smoking | 1.016 | 0.790-1.307 | 0.901 |  |  |  |  |
| Alcohol consumption | 1.012 | 0.793-1.290 | 0.925 |  |  |  |  |
| Treatment | 1.214 | 0.732-2.014 | 0.453 |  |  |  |  |
| PNI | 0.576 | 0.437-0.759 | **<0.001** |  | 0.594 | 0.450-0.784 | **<0.001** |
| SII | 1.417 | 1.099-1.828 | **0.007** |  | 1.341 | 1.038-1.732 | **0.025** |
| Cancer type | 1.027 | 0.799-1.320 | 0.843 |  |  |  |  |

Abbreviations: ECOG, Eastern Cooperative Oncology Group; PNI, prognostic nutritional index; SII, systemic immune-inflammatory index; HR, Hazard Ratio; 95%CI, Confidence interval.

Supplementary Table 3. Baseline characteristics of the lung cancer cohort

| Clinical features | Total | | PNI | | p-value | | | |  | SII | | | p-value | | |
| --- | --- | --- | --- | --- | --- | --- | --- | --- | --- | --- | --- | --- | --- | --- | --- |
| Low  (n= 85) | High  (n=43) | Low  (n=79) | High  (n=49) | |
| Gender |  | |  |  | | 0.437 | | |  |  |  | | 0.536 | | |
| Female | 16 | | 12 | 4 | |  | | |  | 11 | 5 | |  | | |
| Male | 112 | | 73 | 39 | |  | | |  | 68 | 44 | |  | | |
| Age |  | |  |  | | 0.283 | | |  |  |  | | 0.425 | | |
| ＜70 years | 78 | | 49 | 29 | |  | | |  | 46 | 32 | |  | | |
| ≥70 years | 50 | | 36 | 14 | |  | | |  | 33 | 17 | |  | | |
| Differentiation |  | |  |  | | 0.319 | | |  |  |  | | 0.629 | | |
| Poor | 64 | | 39 | 25 | |  | | |  | 42 | 22 | |  | | |
| Moderate or well | 27 | | 18 | 9 | |  | | |  | 15 | 12 | |  | | |
| NA | 37 | | 28 | 9 | |  | | |  | 22 | 15 | |  | | |
| Alcohol consumption | |  |  |  | | | 0.826 |  | |  | |  | | 0.183 |
| Never | | 43 | 28 | 15 | | |  |  | | 30 | | 13 | |  |
| Current/former | | 85 | 57 | 28 | | |  |  | | 49 | | 36 | |  |
| Surgery history |  | |  |  | | 0.851 | | |  |  |  | | 0.794 | | |
| No | 103 | | 68 | 35 | |  | | |  | 63 | 40 | |  | | |
| Yes | 25 | | 17 | 8 | |  | | |  | 16 | 9 | |  | | |
| Clinical Tumor Staging |  | |  |  | | 0.967 | | |  |  |  | | 0.446 | | |
| III | 39 | | 26 | 13 | |  | | |  | 26 | 13 | |  | | |
| IV | 89 | | 59 | 30 | |  | | |  | 53 | 36 | |  | | |
| ECOG |  | |  |  | | 0.851 | | |  |  |  | | 0.844 | | |
| 0-1 | 103 | | 68 | 35 | |  | | |  | 64 | 39 | |  | | |
| ≥2 | 25 | | 17 | 8 | |  | | |  | 15 | 10 | |  | | |
| Smoking |  | |  |  | | 0.840 | | |  |  |  | | 0.480 | | |
| Never | 52 | | 34 | 18 | |  | | |  | 34 | 18 | |  | | |
| Current/former | 76 | | 51 | 25 | |  | | |  | 45 | 31 | |  | | |
| Treatment |  | |  |  | | 0.192 | | |  |  |  | | 0.963 | | |
| Monotherapy | 8 | | 7 | 1 | |  | | |  | 5 | 3 | |  | | |
| Combination | 120 | | 78 | 42 | |  | | |  | 74 | 46 | |  | | |

Abbreviations: NSCLC, non-small cell lung cancer; SCLC, small cell lung cancer; NA, not available; ECOG, Eastern Cooperative Oncology Group; PNI, prognostic nutritional index; SII, systemic immune-inflammatory index.

Supplementary Table 4. Baseline characteristics of the digestive cancer cohort

| Clinical features | Total | PNI | | p-value |  | SII | | p-value |
| --- | --- | --- | --- | --- | --- | --- | --- | --- |
| Low  (n=161) | High  (n=61) | Low  (n=164) | High  (n=58) |
| Gender |  |  |  | 0.396 |  |  |  | 0.617 |
| Female | 67 | 46 | 21 |  |  | 51 | 16 |  |
| Male | 155 | 115 | 40 |  |  | 113 | 42 |  |
| Age |  |  |  | 0.717 |  |  |  | 0.753 |
| ＜70 years old | 134 | 96 | 38 |  |  | 100 | 34 |  |
| ≥70 years old | 88 | 65 | 23 |  |  | 64 | 24 |  |
| Cancer |  |  |  | 0.123 |  |  |  | 0.030 |
| Esophageal | 101 | 80 | 21 |  |  | 66 | 35 |  |
| Gastrointestinal | 65 | 44 | 21 |  |  | 53 | 12 |  |
| Hepatobiliary and Pancreatic | 56 | 37 | 19 |  |  | 45 | 11 |  |
| Differentiation |  |  |  | 0.925 |  |  |  | 0.568 |
| Poor | 79 | 56 | 23 |  |  | 56 | 23 |  |
| Moderate or well | 34 | 23 | 11 |  |  | 24 | 10 |  |
| NA | 109 | 82 | 27 |  |  | 84 | 25 |  |
| Surgery history |  |  |  | 0.260 |  |  |  | 0.032 |
| No | 151 | 113 | 38 |  |  | 105 | 46 |  |
| Yes | 71 | 48 | 23 |  |  | 59 | 12 |  |
| Clinical Tumor Staging |  |  |  | 0.609 |  |  |  | 0.437 |
| III | 75 | 56 | 19 |  |  | 53 | 22 |  |
| IV | 147 | 105 | 42 |  |  | 111 | 36 |  |
| ECOG |  |  |  | 0.612 |  |  |  | 0.745 |
| 0-1 | 183 | 134 | 49 |  |  | 136 | 47 |  |
| ≥2 | 39 | 27 | 12 |  |  | 28 | 11 |  |
| Alcohol consumption |  |  |  | 0.343 |  |  |  | 0.895 |
| Never | 105 | 73 | 32 |  |  | 78 | 27 |  |
| Current/former | 117 | 88 | 29 |  |  | 86 | 31 |  |
| Smoking |  |  |  | 0.281 |  |  |  | 0.331 |
| Never | 171 | 121 | 50 |  |  | 129 | 42 |  |
| Current/former | 51 | 40 | 11 |  |  | 35 | 16 |  |
| Treatment |  |  |  | 0.976 |  |  |  | 0.868 |
| Monotherapy | 18 | 13 | 5 |  |  | 13 | 5 |  |
| Combination | 204 | 148 | 56 |  |  | 151 | 53 |  |

Abbreviations: NA, not available; ECOG, Eastern Cooperative Oncology Group; PNI, prognostic nutritional index; SII, systemic immune-inflammatory index.

Supplementary Table 5. Safety assessment for ICI monotherapy in the entire cohort

|  | PNI- SII score | | |
| --- | --- | --- | --- |
| 0 (n=4) | 1 (n=16) | 2 (n=6) |
| Dermatologic toxicity | 2 (50.00%) | 1 (6.25%) | 0 (0.00%) |
| Endocrine toxicity | 3 (75.00%) | 2 (12.5%) | 1 (16.67%) |
| Hepatic toxicity | 1 (25.00%) | 0 (0.00%) | 1 (16.67%) |
| Renal toxicity | 0 (0.00%) | 0 (0.00%) | 1 (16.67%) |
| Pulmonary toxicity | 0 (0.00%) | 1 (6.25%) | 0 (0.00%) |
| Hematologic toxicity | 0 (0.00%) | 2 (12.50%) | 0 (0.00%) |
| Musculoskeletal toxicity | 0 (0.00%) | 1 (6.25%) | 0 (0.00%) |
| Gastrointestinal toxicity | 0(0.00%) | 3 (18.75%) | 1 (16.67%) |

Abbreviations: PNI, prognostic nutritional index; SII, systemic immune-inflammatory index.

Supplementary Table 6. Safety assessment for combined therapies in the entire cohort

|  | PNI- SII score | | |
| --- | --- | --- | --- |
| 0 (n=78) | 1 (n=167) | 2 (n=79) |
| Dermatologic toxicity | 6 (7.69%) | 3 (1.80%) | 3 (3.80%) |
| Endocrine toxicity | 2 (2.56%) | 2 (1.20%) | 0 (0.00%) |
| Hepatic toxicity | 0 0.00%) | 7 (4.19%) | 2 (2.53%) |
| Renal toxicity | 2 (2.56%) | 3 (1.80%) | 0 (0.00%) |
| Pulmonary toxicity | 4 (5.13%) | 7 (4.19%) | 4 (5.06%) |
| Hematologic toxicity | 38 (48.72%) | 102 (61.08%) | 40 (50.63%) |
| Neurologic toxicity | 15 (19.23%) | 27 (16.17%) | 18 (22.78%) |
| Cardiovascular toxicity | 0 (0.00%) | 0 (0.00%) | 0 (0.00%) |
| Gastrointestinal toxicity | 22 (28.21%) | 52 (31.14%) | 25 (31.65%) |

Abbreviations: PNI, prognostic nutritional index; SII, systemic immune-inflammatory index.
